# Supplementary material for: Herpes simplex virus-1 (HSV-1) infection induces a potent but ineffective IFN-λ production in immune cells of AD and PD patients
Source: PubMed Central journal article supplement (PMC6712644; doi:10.1186/s12967-019-2034-9), 2019-08-27
Supplement: 12967_2019_2034_MOESM2_ESM.pdf [file 12967_2019_2034_MOESM2_ESM.pdf]

|                                 | <b>HSV-1 seronegative AD</b>                | <b>HSV-1 seronegative HC</b>                |
|---------------------------------|---------------------------------------------|---------------------------------------------|
| HSV-1 viral load (copies/ml)    | 1.13x10 <sup>6</sup> ±0.58 x10 <sup>6</sup> | 2.30x10 <sup>6</sup> ±0.64 x10 <sup>6</sup> |
| Fold ICP0                       | 0.09±0.01                                   | 4.92±0.23**                                 |
| Fold UL54                       | 0.28±0.02                                   | 2.00±0.03**                                 |
| Fold UL41                       | 1.94±0.18                                   | 0.84±0.15**                                 |
| Fold UL29                       | 1.77±0.23                                   | 0.91±0.18*                                  |
| Fold UL48                       | 5.93±0.21                                   | 0.92±0.05**                                 |
| Fold LAT                        | 6.44±0.25                                   | 0.70±0.02**                                 |
| IFN-λ (pg/ml)                   | 400±123.23                                  | 0.02±0.001*                                 |
| IFN-λ mRNA (Fold-change/medium) | 0.17±0.025                                  | 0.02±0.001**                                |
| IL-10 (med) (pg/ml)             | 169.53±98.23                                | 369.70±102.3                                |
| IL-10 (HSV-1) (pg/ml)           | 225.74±105.35                               | 565.94±203.21                               |
| IL-1β (med) (pg/ml)             | 2.21±2.80                                   | 0.50±1.56                                   |
| IL-1β (HSV-1) (pg/ml)           | 8.60±1.98                                   | 5.60±4.9                                    |

Summary statistics table of: HSV-1 (IE, E and L) genes fold, IFN-λ mRNA fold quantified by qPCR; cytokines IL-10, IL-1β concentration (pg/ml) in supernatants of cultured PBMC and IFN-λ serum concentration evaluated by ELISA. Data were shown as means ± SD. Statistical analyses between HSV-1 seronegative AD *versus* HC were shown. \* pvalue ≤ 0.005; \*\*pvalue ≤ 0.001.
