# Supplementary material for: Herpes simplex virus-1 (HSV-1) infection induces a potent but ineffective IFN-λ production in immune cells of AD and PD patients
Source: PubMed Central journal article supplement (PMC6712644; doi:10.1186/s12967-019-2034-9), 2019-08-27
Supplement: 12967_2019_2034_MOESM3_ESM.pdf [file 12967_2019_2034_MOESM3_ESM.pdf]

**Summary of unnormalized data.**

| ID     | AbHSV-1 | PATOLOGY | HSV-1 gene expression (cycle threshold) |       |       |               |       |       |               |       |       | HSV-1 gene expression (Fold) |       |        |        |       |        |
|--------|---------|----------|-----------------------------------------|-------|-------|---------------|-------|-------|---------------|-------|-------|------------------------------|-------|--------|--------|-------|--------|
|        |         |          | YWHAZ 1h p.i.                           | ICP0  | ICP27 | YWHAZ 4h p.i. | ICP8  | UL41  | YWHAZ 6h p.i. | VP16  | LAT   | ICP0                         | ICP27 | ICP8   | UL41   | VP16  | LAT    |
| 17R129 | POS     | PD       | 25,98                                   | 28,33 | 24,47 | 28,45         | 24,59 | 29,21 | 28,45         | 23,77 | 21,2  | 0,24                         | 0,27  | 5,78   | 4,11   | 2,25  | 5,62   |
| 17R165 | POS     | PD       | 22,7                                    | 30,53 | 27,2  | 23,12         | 21,92 | 25,95 | 23,12         | 24,14 | 22,21 | 0,00                         | 0,00  | 3,72   | 2,93   | 1,26  | 2,73   |
| 17R187 | POS     | PD       | 31,56                                   | 26,78 | 22,45 | 29,85         | 22,32 | 26,31 | 29,85         | 27,76 | 21,73 | 15,56                        | 40,22 | 299,00 | 242,19 | 10,84 | 404,50 |
| 17R188 | POS     | PD       | 25,88                                   | 25,03 | 21,95 | 26,9          | 22,03 | 25,95 | 26,9          | 24,97 | 22,35 | 1,02                         | 1,11  | 47,31  | 40,22  | 9,70  | 34,06  |
| 17R285 | POS     | PD       | 21,55                                   | 29,04 | 22,58 | 24,68         | 23,67 | 29,32 | 24,68         | 23,1  | 22,04 | 0,00                         | 0,04  | 3,26   | 0,84   | 7,61  | 9,06   |
| 17R287 | POS     | PD       | 26,43                                   | 25,13 | 21,68 | 26,4          | 23,08 | 27,57 | 26,4          | 30,68 | 33,06 | 1,39                         | 1,96  | 16,16  | 9,25   | 0,13  | 0,01   |
| 17R289 | POS     | PD       | 27,4                                    | 26,96 | 23,5  | 29,19         | 23,1  | 27,16 | 29,19         | 24,26 | 21,58 | 0,77                         | 1,09  | 110,20 | 85,04  | 77,60 | 284,05 |
| 17R299 | POS     | PD       | 27,48                                   | 23,82 | 21,26 | 26,12         | 23,64 | 27,97 | 26,12         | 23,61 | 22,71 | 7,16                         | 5,43  | 9,03   | 5,78   | 14,50 | 15,45  |
| 17R189 | POS     | PD       | 26,41                                   | 29,06 | 26    | 29,89         | 25,36 | 32,05 | 28            | 25,69 | 23,43 | 0,09                         | 0,10  | 37,37  | 4,66   | 12,62 | 34,54  |
| 17R325 | POS     | PD       | 26,3                                    | 28,36 | 24,24 | 30,47         | 23,72 | 30,1  | 28,28         | 23,75 | 23,25 | 0,14                         | 0,30  | 174,13 | 26,91  | 58,81 | 47,50  |
| 16R324 | POS     | AD       | 24,33                                   | 24,71 | 22,03 | 23,47         | 23,08 | 29    | 29,09         | 24,04 | 21,45 | 0,44                         | 0,36  | 2,12   | 0,45   | 84,33 | 290,02 |
| 15R221 | POS     | AD       | 24,31                                   | 26,47 | 23,58 | 22,86         | 22,24 | 27,44 | 25            | 22,04 | 20,65 | 0,13                         | 0,12  | 2,49   | 0,87   | 19,81 | 29,65  |
| 15R44  | POS     | AD       | 25,82                                   | 27,25 | 23,59 | 26,45         | 25,74 | 31,72 | 29,57         | 25,45 | 23,72 | 0,21                         | 0,34  | 2,65   | 0,54   | 3,29  | 6,23   |
| 15R155 | POS     | AD       | 24,61                                   | 28,79 | 26,51 | 22,16         | 22,67 | 27,42 | 22,61         | 23,32 | 23,82 | 0,03                         | 0,02  | 1,14   | 0,54   | 1,56  | 0,63   |
| 14R342 | POS     | AD       | 25,95                                   | 29,46 | 27,42 | 26,51         | 26,29 | 30,21 | 29,29         | 24,73 | 23,16 | 0,05                         | 0,03  | 1,88   | 1,60   | 60,05 | 101,83 |
| 15R45  | POS     | AD       | 28,89                                   | 28,63 | 23,22 | 28,89         | 23,51 | 27,77 | 28,89         | 27,38 | 26,37 | 0,68                         | 3,71  | 67,37  | 45,25  | 7,25  | 8,34   |
| 17R146 | POS     | AD       | 26,04                                   | 22,99 | 21,88 | 27,52         | 22,46 | 27,07 | 28,32         | 29,16 | 22,97 | 4,69                         | 1,30  | 53,97  | 28,44  | 1,42  | 59,30  |
| 17R238 | POS     | AD       | 27,92                                   | 29,1  | 25,5  | 26,51         | 21,81 | 26,06 | 24,8          | 24,53 | 23,26 | 0,25                         | 0,39  | 42,05  | 28,44  | 3,07  | 4,23   |
| 17R250 | POS     | AD       | 24,8                                    | 29,84 | 25,38 | 23,26         | 24,28 | 29,86 | 24,8          | 23,45 | 22,7  | 0,02                         | 0,05  | 0,80   | 0,21   | 6,49  | 6,23   |
| 17R266 | POS     | AD       | 25,21                                   | 30,01 | 24,16 | 24,76         | 21,63 | 25,46 | 25,21         | 24,02 | 23,97 | 0,02                         | 0,15  | 14,16  | 12,82  | 5,81  | 3,43   |
| 17R93  | POS     | HC       | 27,34                                   | 25,27 | 23,26 | 26,47         | 24,94 | 30,27 | 27,14         | 31,77 | 33,24 | 2,38                         | 1,23  | 4,67   | 1,49   | 0,10  | 0,02   |
| 17R47  | POS     | HC       | 25,66                                   | 26,63 | 25,49 | 24,66         | 28,93 | 29,94 | 29,94         | 30,56 | 31,33 | 0,29                         | 0,08  | 0,08   | 0,54   | 1,66  | 0,55   |
| 17R43  | POS     | HC       | 24,12                                   | 29,04 | 26,3  | 28,22         | 31,66 | 25,57 | 26,01         | 28,71 | 26,62 | 0,02                         | 0,02  | 0,15   | 130,69 | 0,39  | 0,95   |
| 17R42  | POS     | HC       | 27                                      | 24,27 | 24,26 | 21,91         | 23,39 | 28,67 | 28,42         | 30,56 | 32,34 | 3,76                         | 0,49  | 0,58   | 0,19   | 0,58  | 0,10   |
| 17R270 | POS     | HC       | 28,09                                   | 25,07 | 21,02 | 23,02         | 23,2  | 29,36 | 24,38         | 24,73 | 25,92 | 4,59                         | 9,78  | 1,43   | 0,26   | 2,00  | 0,50   |
| 17R269 | POS     | HC       | 28                                      | 25,67 | 22,28 | 25,75         | 22,01 | 26,46 | 28,41         | 27,13 | 25,79 | 2,85                         | 3,84  | 21,62  | 12,73  | 6,18  | 8,94   |
| 17R268 | POS     | HC       | 26,95                                   | 21,81 | 18,3  | 23,03         | 23,11 | 28,07 | 27,09         | 25,01 | 24,15 | 19,97                        | 29,24 | 1,53   | 0,63   | 10,76 | 11,16  |
| 17R259 | POS     | HC       | 29,94                                   | 27,55 | 22,91 | 24,58         | 23,13 | 28,19 | 24,75         | 26,19 | 16,1  | 2,97                         | 9,51  | 4,42   | 1,71   | 0,94  | 584,07 |
| 17R263 | POS     | HC       | 29,26                                   | 25,53 | 22,47 | 21,78         | 23,16 | 29,2  | 23,33         | 24,71 | 27,31 | 7,52                         | 8,06  | 0,62   | 0,12   | 0,98  | 0,09   |
| 14R105 | POS     | HC       | 27,49                                   | 27,8  | 24,1  | 25,23         | 23,9  | 28,03 | 29,2          | 25,69 | 24,44 | 0,46                         | 0,76  | 4,07   | 2,99   | 29,00 | 39,397 |
